# Supplementary material for: Protein Levels of Pro-Inflammatory Cytokines and Chemokines as Biomarkers of Mycobacterium bovis Infection and BCG Vaccination in Cattle
Source: MDPI journal article supplement (doi:10.3390/pathogens11070738), 2022-06-29
Supplement: s1 [file s1]

**Supplementary Table S1: Assay details of analytes evaluated in the study.**

| <b>Analyte</b> | <b>Supplier</b>    | <b>Coating Antibody Concentration</b> | <b>Composition of Coating Buffer</b> | <b>Composition of Blocking Buffer</b> | <b>Detection Antibody Concentration</b> | <b>Streptavidin HRP Dilution</b> | <b>Composition of Incubation/ dilution/reagent diluent buffers</b> | <b>Assay Range</b> | <b>Detection Limit / Sensitivity</b> |
|----------------|--------------------|---------------------------------------|--------------------------------------|---------------------------------------|-----------------------------------------|----------------------------------|--------------------------------------------------------------------|--------------------|--------------------------------------|
| IFN $\gamma$   | Mabtech            | 2 $\mu$ g/ml                          | PBS pH=7.4                           | 0.05% Tween 20 and 0.1 % BSA          | 0.25 $\mu$ g/ml                         | 1 in 1000                        | 0.05% Tween 20 and 0.1 % BSA                                       | 4-400 pg/ml        | 2.1 pg/ml                            |
| IL-2           | Mabtech            | 2 $\mu$ g/ml                          | PBS pH=7.4                           | 0.05% Tween 20 and 0.1 % BSA          | 0.1 $\mu$ g/ml                          | 1 in 1000                        | 0.05% Tween 20 and 0.1 % BSA                                       | 17-1700 pg/ml      | 50 pg/ml                             |
| IL-8           | Mabtech            | 2 $\mu$ g/ml                          | PBS pH=7.4                           | 0.05% Tween 20 and 0.1 % BSA          | 0.1 $\mu$ g/ml                          | 1 in 1000                        | 0.05% Tween 20 and 0.1 % BSA                                       | 8-800 pg/ml        | 17 pg/ml                             |
| IL-17A         | Mabtech            | 2 $\mu$ g/ml                          | PBS pH=7.4                           | 0.05% Tween 20 and 0.1 % BSA          | 1 $\mu$ g/ml                            | 1 in 1000                        | 0.05% Tween 20 and 0.1 % BSA                                       | 1-200 pg/ml        | 2 pg/ml                              |
| CXCL9          | Biorad             | 1 $\mu$ g/ml                          | Carbonate bicarbonate buffer pH=9.4  | 1 % BSA in PBS                        | 0.2 $\mu$ g/ml                          | 1 in 400                         | 0.05% Tween 20 in PBS                                              | 1-50 ng/ml         | 0.69 ng/ml                           |
| IP-10          | Biorad             | 1 $\mu$ g/ml                          | Carbonate bicarbonate buffer pH=9.4  | 1 % BSA in PBS                        | 0.2 $\mu$ g/ml                          | 1 in 400                         | 0.05% Tween 20 in PBS                                              | 1-50ng/ml          | 0.90 ng/ml                           |
| IL-1 $\beta$   | ThermoFisher       | 1: 100                                | Carbonate bicarbonate buffer pH=9.4  | 4 % BSA and 5% sucrose in D-PBS       | 1: 100                                  | 1 in 400                         | 4% BSA in D-PBS                                                    | 31-2000 pg/ml      | 26 pg/ml                             |
| IL-6           | ThermoFisher       | 1:100                                 | Carbonate bicarbonate buffer pH=9.4  | 4 % BSA and 5% sucrose in D-PBS       | 1: 100                                  | 1 in 400                         | 4% BSA in D-PBS                                                    | 78-5000 pg/ml      | 186 pg/ml                            |
| CCL4           | KINGFISHER BIOTECH | 1 $\mu$ g/ml                          | D-PBS pH=7.4                         | 4%BSA in D-PBS                        | 0.1 $\mu$ g/ml                          | 1 in 400                         | 4% BSA in D-PBS                                                    | 1-25 ng/ml         | 0.03 ng/ml                           |

PBS: Phosphate Buffer saline; D-PBS: Dulbecco's Phosphate Buffer Saline (Lonza); BSA: Bovine Serum Albumin (Sigma)

**Supplementary Table S2:** Levels of IFN $\gamma$ , IL-2, IP-10, CXCL-9 and CCL4 in stimulated whole blood supernatants and serum

| Analyte      | Group                                                | Median Concentrations and Ranges (pg/ml)       |                                          |                    |
|--------------|------------------------------------------------------|------------------------------------------------|------------------------------------------|--------------------|
|              |                                                      | Medium/Nil Stimulated Whole Blood Supernatants | PPDb Stimulated Whole Blood Supernatants | Serum              |
| IFN $\gamma$ | Naïve cohort 1                                       | 0 (0,0)                                        | 242 (0,696)                              | 0 (0,0)            |
|              | <i>M. bovis</i> challenged cohort                    | 0 (0,7)                                        | 4000 (2962,5725)                         | 0 (0,4000)         |
|              | Naïve cohort 2                                       | 0 (0,6)                                        | 292 (0,924)                              | 0 (0,0)            |
|              | BCG Vaccinated cohort                                | 0 (0,0)                                        | 214 (0,1109)                             | 0 (0,141)          |
|              | BCG Vaccinated and <i>M. bovis</i> challenged cohort | 0 (0,0)                                        | 835 (252,1664)                           | 0 (0,0)            |
| IL-2         | Naïve cohort 1                                       | 230 (128,441)                                  | 401 (130,762)                            | 376 (246,1591)     |
|              | <i>M. bovis</i> challenged cohort                    | 568 (134,1504)                                 | 12703 (4571,20918)                       | 293 (185,4250)     |
|              | Naïve cohort 2                                       | 36 (14,342)                                    | 67 (29,287)                              | 26 (4,155)         |
|              | BCG Vaccinated cohort                                | 252 (106,1249)                                 | 371 (264,1555)                           | 0 (0,21)           |
|              | BCG Vaccinated and <i>M. bovis</i> challenged cohort | 463 (258,3129)                                 | 2030 (883,10559)                         | 122 (65,233)       |
| IP-10        | Naïve cohort 1                                       | 2975 (1389,14265)                              | 3090 (1390,13636)                        | 2975 (2123, 4326)  |
|              | <i>M. bovis</i> challenged cohort                    | 11011 (0,44246)                                | 69044 (26933,128126)                     | 6778 (4448,74988)  |
|              | Naïve cohort 2                                       | 8132 (0,19516)                                 | 28073 (1662,12376)                       | 9857 (3665,18426)  |
|              | BCG Vaccinated cohort                                | 3803 (0,13574)                                 | 15040 (1537,41781)                       | 8713 (6111,19038)  |
|              | BCG Vaccinated and <i>M. bovis</i> challenged cohort | 2953 (1333,21740)                              | 15989 (9108, 44460)                      | 6998 (4299,7882)   |
| CXCL-9       | Naïve cohort 1                                       | 920 (296,7350)                                 | 770 (98,4597)                            | 891.5 (500, 2235)  |
|              | <i>M. bovis</i> challenged cohort                    | 6682 (778, 15773)                              | 14480 (1702,17683)                       | 13351 (2015,19135) |
|              | Naïve cohort 2                                       | 110 (0,2642)                                   | 769 (0,5519)                             | 896 (0,4189)       |
|              | BCG Vaccinated cohort                                | 1772 (506,8100)                                | 2152 (1013,8318)                         | 1013 (0,2784)      |
|              | BCG Vaccinated and <i>M. bovis</i> challenged cohort | 1241 (580,5912)                                | 1740 (820,5598)                          | 786 (639, 3174)    |
| CCL4         | Naïve cohort 1                                       | 510 (270,3900)                                 | 2265 (1000,5510)                         | 140 (10,300)       |
|              | <i>M. bovis</i> challenged cohort                    | 218 (90,19913)                                 | 27743 (16100,61254)                      | 400 (20, 29760)    |
|              | Naïve cohort 2                                       | 0 (0,4254)                                     | 22982 (4987, 39569)                      | 0 (0,50)           |
|              | BCG Vaccinated cohort                                | 0 (0,456)                                      | 16789 (5732,30620)                       | 0 (0, 73)          |
|              | BCG Vaccinated and <i>M. bovis</i> challenged cohort | 315 (60,12650)                                 | 18570 (10290, 34300)                     | 30 (20,80)         |

**Supplementary Table S3:** Levels of IL-8, IL-17A, IL-1 $\beta$  and IL-6 in stimulated whole blood supernatants and serum

| Analyte      | Group                             | Median Concentrations and Ranges (pg/ml)       |                                          |                |
|--------------|-----------------------------------|------------------------------------------------|------------------------------------------|----------------|
|              |                                   | Medium/Nil Stimulated Whole Blood Supernatants | PPDb Stimulated Whole Blood Supernatants | Serum          |
| IL-8         | Naïve cohort 1                    | 612 (348,1644)                                 | 2013 (1472,2435)                         | 476 (154,1051) |
|              | <i>M. bovis</i> challenged cohort | 790 (152, 8909)                                | 2270 (983,6277)                          | 670 (0,2939)   |
| IL-17A       | Naïve cohort 1                    | 0 (0,0)                                        | 0 (0,3.1)                                | 0 (0,0)        |
|              | <i>M. bovis</i> challenged cohort | 0 (0,0)                                        | 125 (0,706)                              | 0 (0,1222)     |
| IL-1 $\beta$ | Naïve cohort 1                    | 0 (0,61)                                       | 182 (40,629)                             | 67 (51, 157)   |
|              | <i>M. bovis</i> challenged cohort | 141 (4,1233)                                   | 583 (121,11701)                          | 29 (0, 963)    |
| IL-6         | Naïve cohort 1                    | 145 (0,3946)                                   | 936 (504,4145)                           | 137 (0,2116)   |
|              | <i>M. bovis</i> challenged cohort | 0 (0,13050)                                    | 1556 (118, 12348)                        | 0 (0, 2860)    |

**Supplementary Table S4:** Potential of multibiomarker analysis to discriminate between animals that were *M. bovis* challenged and naïve animals.

| <i>(a) Analysis by comparing levels in bovine tuberculin (PPDb) stimulated whole blood supernatants</i> |                      |                         |                       |        |         |
|---------------------------------------------------------------------------------------------------------|----------------------|-------------------------|-----------------------|--------|---------|
| Animal Groups                                                                                           | NUM Score<br>Cut-off | Sensitivity (95% CI)    | Specificity (95% CI)  | AUC    | p-value |
| Naïve vs. <i>M. bovis</i> challenged                                                                    | >3                   | 100% (70.09 to 100.0)   | 100% (80.64 to 100.0) | 1      | <0.001  |
| <i>(b) Analysis by comparing serum concentrations</i>                                                   |                      |                         |                       |        |         |
| Animal Groups                                                                                           | Cut-off              | Sensitivity (95% CI)    | Specificity           | AUC    | p-value |
| Naïve vs. <i>M. bovis</i> challenged                                                                    | > 3                  | 88.89% (56.50 to 99.43) | 100% (80.64 to 100.0) | 0.9792 | <0.001  |

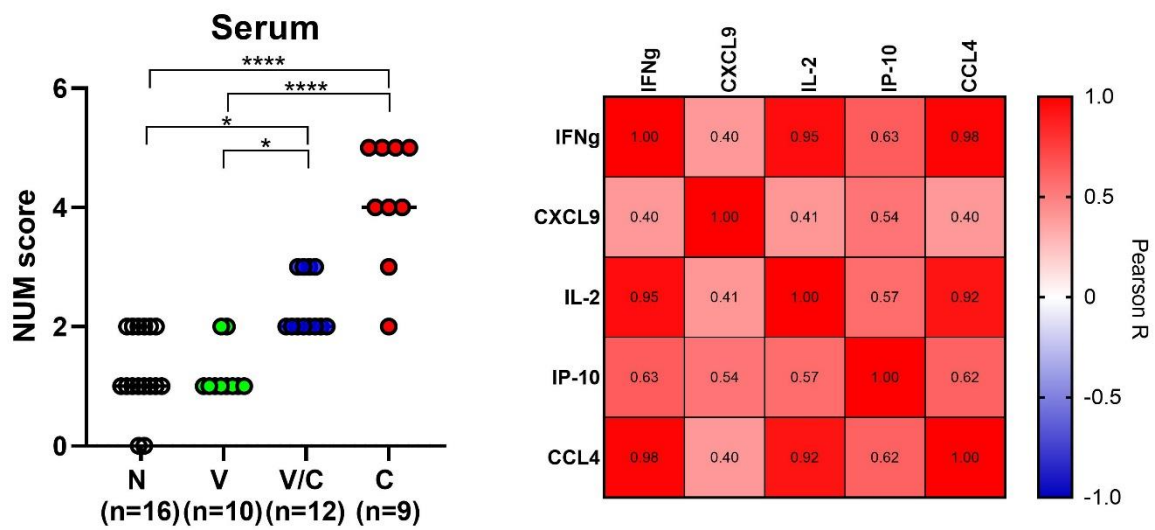

**Supplementary Figure S1:** NUM score, indicating the number of positive host proteins per animal calculated for serum samples (cut-off values determined via Youden's index), can be used to discriminate groups of naïve (N), BCG vaccinated (V) and *M. bovis* challenged animals with (V/C) or without (C) prior BCG vaccination (left). Heat-map showing correlation among concentrations of the evaluated host proteins (right) \*  $p < 0.05$ , \*\*\*\*  $p < 0.0001$ .
